# Supplementary material
Source: PubMed Central journal article supplement (PMC3289743)
Supplement: NIHMS335074-supplement-01.pdf [file NIHMS335074-supplement-01.pdf]

**Supplementary Data:**

## FPLC spectra

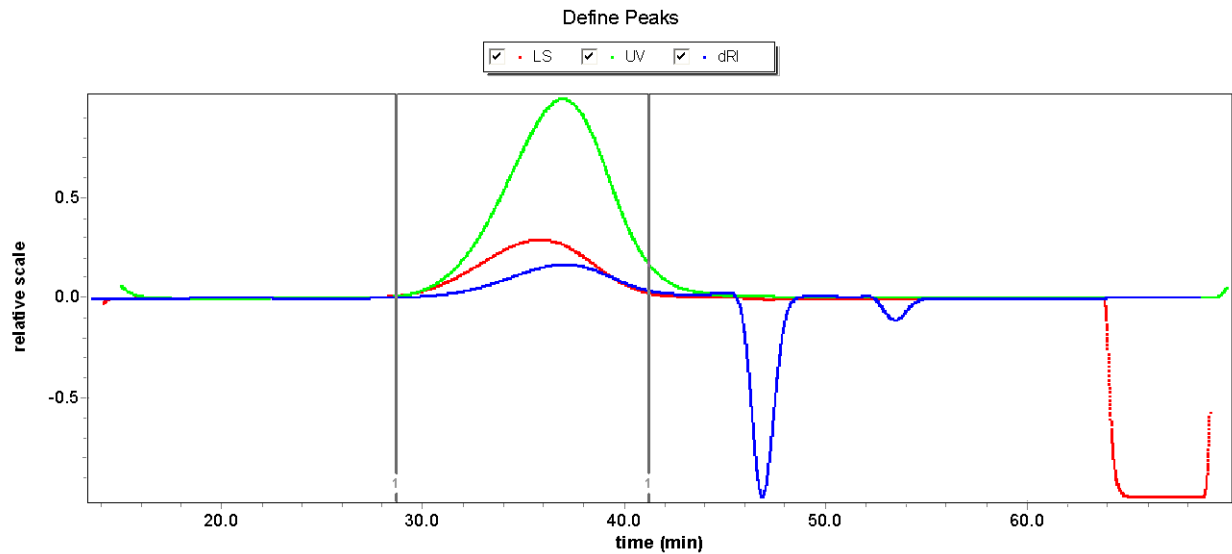

FPLC spectra for p(CBA-DAH) in 0.3 M sodium acetate, pH 5.0. Curves are as follows: red – light scattering, green – ultraviolet, blue – diffractive index

## NMR Spectra

The  $^1\text{H}$  NMR spectra of the three constructed polymers ( $\text{D}_2\text{O}$ , 400 MHz). (A) p(CBA-DAH), (B) PEG-p(CBA-DAH), and (C) Eph-PEG-p(CBA-DAH)
